# Supplementary material for: Evaluation of Phenotypic Diversity and Genetic Parameters in Nepalese Finger Millet (Eleusine Coracana L. Gaertn) Landraces
Source: Research Square preprint supplement (doi:10.21203/rs.3.rs-7954813/v1), 2025-10-29
Supplement: Supplementary file 1 [file 7f531981757c6688c9e0c0b5.xlsx]

## Sheet: Final data
Accesions	DTFH	DTFPH	DTEPM	FLBL	FLBW	LBL	LBW	LSH	LSD	LNPP	PT	EXT	CT	FL	FW	PH	FPP	GPS	THSW	BY	GY
C013408	85	93	143	20.52	0.99	30.45	1.14	8.64	5.375	13.8	3.2	13.34	5.764	5.55	1	100.62	7.4	1817.6	2.37	20.225	1.65
C012230	84	94	158	25.2	0.87	33.09	1.04	9.16	6.06	13.4	3.1	13.7	6.148	7	1.09	102.81	6.8	2843.3	2.715	23.0667	3.38333
C013407	82	93	139.5	25.78	0.93	32	1.25	9.01	5.685	12.1	3.4	14.43	5.44	5.53	1.07	98.29	6.8	2553.8	2.625	25.175	3.45
C012298	93	99	163	24.55	0.84	32.32	1.21	10.46	6.231	14.1	3.2	12.45	6.428	6.3	1.03	86.92	7.6	2162.1	3.07	22.3333	1.81667
C011694	80	93	156	23.1	0.94	33.93	1.16	10.28	6.325	14.2	3.3	11.74	7.021	8.62	0.97	105.24	6.4	2750.6	2.57	21.8333	2.45
C010980	78	87	135	24.8	0.97	29.56	1.06	7.7	6.365	10.4	3.7	12.65	6.486	9.24	0.94	96.55	6.5	1923.6	2.925	16.8667	2.75833
C011695	71	80	136	31.42	1.02	38.92	1.16	10.5	6.434	9.9	2.2	15.63	5.667	5.96	1	89.6	5.8	5030.6	2.645	13.38	2.3
NGRC05049	73	87	136	27.17	1.06	33.15	1.17	10.6	5.544	11.6	2.7	14.84	5.691	7.67	0.94	103.1	6.6	2777.1	2.725	20.1333	3.74167
C012435	93	100	164	26.94	0.92	35.51	0.94	7.22	4.626	14.2	4.2	7.77	6.362	10.94	0.98	88.6	5.9	1437.7	2.425	19.6167	3.475
C013048	96	107	164	25.74	0.95	30.24	0.918	6.37	5.714	14.9	3.1	5.27	5.269	10.6	0.73	90.07	5.9	1286	2.405	22.525	2.075
C011708	90	99	154	25.25	1.04	38.32	1.18	9	6.533	16.2	3.1	12.99	6.132	6.97	1.08	106.39	7.6	1806	2.64	22.775	2.30833
C013344	75	83	139	29.1	1.18	37.3	1.15	10.99	5.089	11.8	4.2	14.29	6.044	6.38	1.08	102.35	6.3	2593.4	2.485	17.7667	2.375
C013026	93	97	156	24.11	0.91	34.42	1.02	9.3	5.32	14.8	4.1	9.57	6.023	6.09	1.12	93.03	7	2332.8	3.085	19.2167	2.63333
C013324	69	81	132	25.07	0.9	38	1.17	9.7	5.176	10.6	3.2	12.36	4.899	5.84	1.06	97.59	5.6	2306.5	2.69	20.51	3.29167
C011701	87	97	160	26.18	0.98	33.72	1.09	9.9	5.01	14.7	4.6	13.39	6.636	8.19	1.06	98.69	6.6	2036.4	2.805	21.3583	2.95833
C010047	77	88	158	24.15	0.86	30.62	1.99	8.69	4.705	11.4	3.2	11.25	6.131	5.82	1.03	79.13	6	1944.6	2.71	13.65	2.675
C012460	84	96	144	29.55	1.11	40.2	1.16	9.09	5.414	12.8	2.8	15.22	5.761	5.18	1.05	92.88	6.4	2250.4	2.885	24	2.00833
C013039	75	85	134	26.01	1.02	34.31	0.99	9.67	6.105	11.4	3.7	12.73	6.106	5.99	1.08	95.76	7.3	2579	2.93	19.55	3.75
C012712	78	90	139	26.33	1.05	34.15	1.11	10.36	4.858	10.5	3.2	14.91	5.292	8.86	0.96	107.14	5.6	1956.4	3.24	23.3833	3.28333
C013252	70.5	80	130	28.9	0.98	38.12	2.15	10.8	4.72	12.9	3.7	15.12	5.32	5.24	1	115.29	7.65	2543.6	2.37	26.1917	2.55
C011943	61	69	117	23.9	0.77	39.67	1.19	11.22	5.66	9.4	1.7	17.59	5.357	4.72	1.05	116.76	7	2335.7	2.845	11.8417	1.99167
C013308	75	84	139	25.57	0.95	33.04	1.08	10.84	5.373	12.8	2.6	14.33	5.622	5.42	1.05	108.33	6.6	2184.2	2.62	23.6917	2.78333
C014422	59	65	103	25.47	0.83	36.61	1.19	10.26	6.887	6.8	2	17.53	5.55	4.64	1.4	100.55	7.7	2369.5	2.87	8.28333	1.45
C011702	79	96	157	25.63	0.92	38.46	1.21	9.5	5.337	11.9	3.6	14.93	5.475	5.55	1.09	103.6	7.1	2593.2	2.59	23.2917	2.625
C011714	69	77	134	24.5	0.92	38.77	1.36	10.2	5.376	9.6	2.2	14.25	4.976	4.87	1.02	109.65	6.9	2544.2	3.18	18.05	3.20833
C012722	78	85	141	23.5	0.88	35.48	1.11	9.13	5.273	11.8	3.2	15.9	5	9.05	1.08	216.81	5.8	2173.1	2.995	19.9167	3.05833
C013519	74	84	143	23.79	0.93	33.5	1.23	10.63	7.156	9.7	2.3	12.4	5.372	7.45	1.11	100.51	6	2330.1	3.53	19.3	3.53333
C011696	79	84	129	30.82	1.23	42.2	1.14	9.85	6.294	11.3	3.8	27.72	5.812	7.7	1.09	105.98	6.5	3090.9	2.36	27.05	3.85
C012246	84	93	146	27.16	1.05	36.76	1.32	10.2	5.974	12.3	3.6	11.57	6.033	6.59	1.14	94.54	8.9	2920	2.84	21.85	1.71667
C011711	69	78	130	27.95	1.14	32.79	1.24	10.39	6.884	11.775	2.6	13.93	5.506	6.88	1.16	109.59	7.4	2974.8	3.45	19.875	3.38333
NGRC05050	71	81	136	29.06	1.08	40.9	1.21	10.23	5.982	9.1	3.4	11.13	5.417	6.37	1.1	97.34	6	1762.6	3.075	22.0167	4.4
C013343	73	83	136	25.45	0.95	39.23	1.24	9.72	6.433	11.4	4.8	13.77	5.704	5.87	1.1	111.93	6.5	2859.8	2.94	25.6083	3.64167
C012327	82	93	149	25.48	0.87	36.77	1.37	8.86	6.464	11.4	4.7	12.42	5.722	5.68	1	103.2	7.4	2594.38	2.775	24.775	2.55
